# Supplementary material for: Stable organic dyes based on the benzo[1,2-b:4,5-b′]dithiophene donor for efficient dye-sensitized solar cells
Source: Royal Society of Chemistry journal article supplement (doi:10.1039/c5ta00332f), 2015-01-01
Supplement: c5ta00332f1.pdf [file c5ta00332f1.pdf]

## Supporting Information

### **Stable organic dyes based on the benzo[1,2-b:4,5-b'] dithiophene donor for efficient dye-sensitized solar cells**

*Yi-Fan Chen,<sup>a</sup> Jun-Min Liu,<sup>a,\*</sup> Jian-Feng Huang,<sup>a</sup> Li-Lin Tan,<sup>a</sup> Yong Shen,<sup>a</sup> Li-Min Xiao,<sup>b</sup> Dai-Bin Kuang<sup>a</sup> and Cheng-Yong Su<sup>a,\*</sup>*

<sup>a</sup> MOE Laboratory of Bioinorganic and Synthetic Chemistry/KLGHEI of Environment and Energy Chemistry, State Key Laboratory of Optoelectronic Materials and Technologies, Lehn Institute of Functional Materials, School of Chemistry and Chemical Engineering, Sun Yat-Sen University, Guangzhou, 510275, China.

<sup>b</sup> School of Computer Science and Engineering, Beihang University, Beijing, 100191, China.

1. **Figure S1** Cyclic voltammograms of **CYF1** on TiO<sub>2</sub> in 0.1 M TBAPF<sub>6</sub> of CH<sub>2</sub>Cl<sub>2</sub> solution measured with a scan rate of 50 mV s<sup>-1</sup>.
2. **Figure S2** (a) Cyclic voltammograms and (b) partial cyclic voltammograms of **CYF2** on TiO<sub>2</sub> in 0.1 M TBAPF<sub>6</sub> of CH<sub>2</sub>Cl<sub>2</sub> solution measured with a scan rate of 50 mV s<sup>-1</sup>.
3. **Figure S3** Cyclic voltammograms of Fc/Fc<sup>+</sup> in 0.1 M TBAPF<sub>6</sub> of CH<sub>2</sub>Cl<sub>2</sub> solution measured with a scan rate of 50 mV s<sup>-1</sup>.
4. **Table S1** The dihedral angles between the phenyl planes and thiophene units in **CYF1** and **CYF2** sensitizers.

---

To whom correspondence should be addressed. Tel: +86-20-84115178. Fax: +86-20-84115178. E-mail: [liujunm@mail.sysu.edu.cn](mailto:liujunm@mail.sysu.edu.cn) (J.-M. Liu); [cesscy@mail.sysu.edu.cn](mailto:cesscy@mail.sysu.edu.cn) (C.-Y. Su)

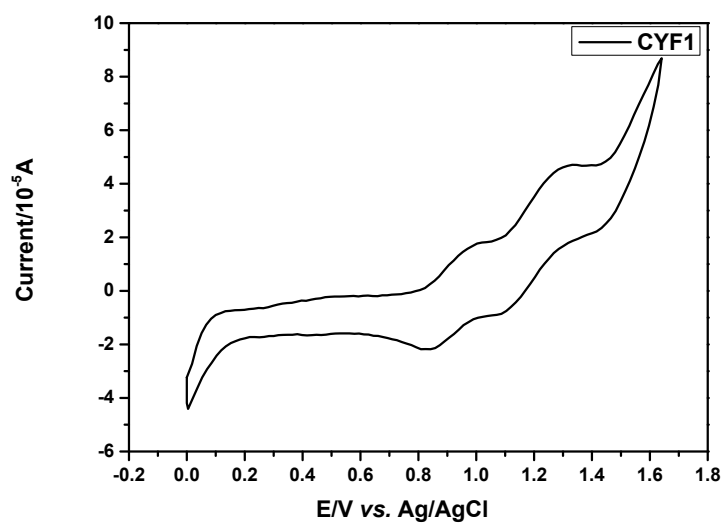

Figure S1. Cyclic voltammograms of **CYF1** on TiO<sub>2</sub> in 0.1 M TBAPF<sub>6</sub> of CH<sub>2</sub>Cl<sub>2</sub> solution measured with a scan rate of 50 mV s<sup>-1</sup>.

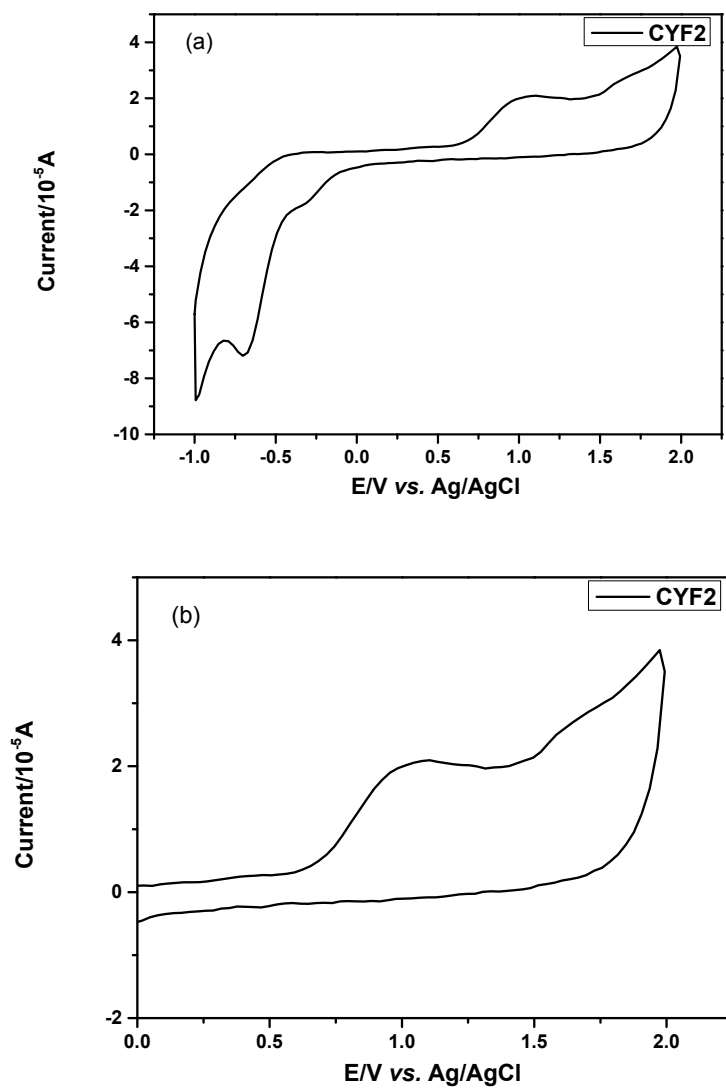

Figure S2. (a) Cyclic voltammograms and (b) partial cyclic voltammograms of **CYF2** on TiO<sub>2</sub> in 0.1 M TBAPF<sub>6</sub> of CH<sub>2</sub>Cl<sub>2</sub> solution measured with a scan rate of 50 mV s<sup>-1</sup>.

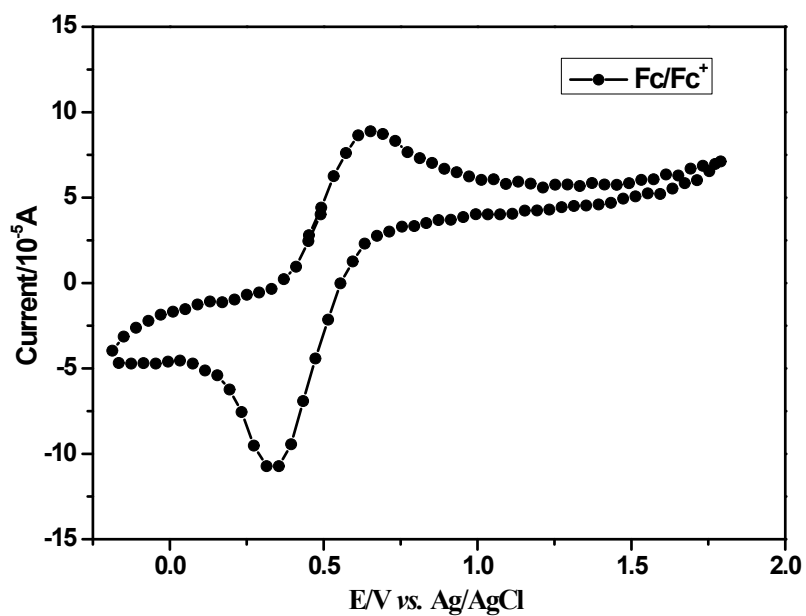

Figure S3. Cyclic voltammograms of Fc/Fc<sup>+</sup> in 0.1 M TBAPF<sub>6</sub> of CH<sub>2</sub>Cl<sub>2</sub> solution measured with a scan rate of 50 mV s<sup>-1</sup>.

**Table S1** The dihedral angles between the phenyl planes and thiophene units in **CYF1** and **CYF2** sensitizers.

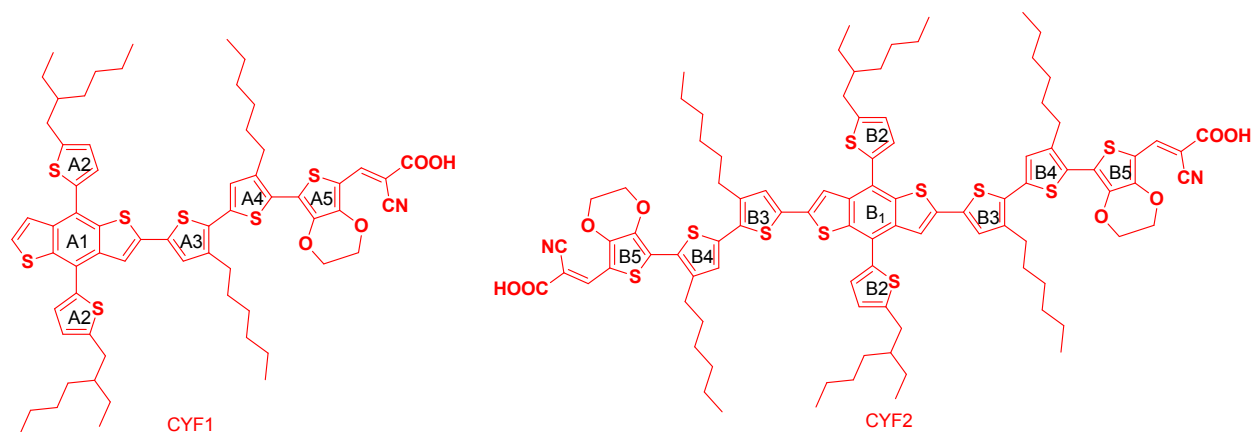

| <b>CYF1</b> | Angle(°) | <b>CYF2</b> | Angle(°) |
|-------------|----------|-------------|----------|
| A1-A2       | 53.2°    | B1-B2       | 53.5°    |
| A1-A3       | 9.2°     | B1-B3       | 9.7°     |
| A3-A4       | 44.5°    | B3-B4       | 24.6°    |
| A4-A5       | 43.2°    | B4-B5       | 44.5°    |
